## RESEARCH ARTICLE

# Endocrine regulation of carbonate precipitate formation in marine fish intestine by stanniocalcin and PTHrP

Sílvia F. Gregório, Edison S. M. Carvalho, Marco A. Campinho, Deborah M. Power, Adelino V. M. Canário and Juan Fuentes\*

**ABSTRACT**

In marine fish, high epithelial bicarbonate secretion by the intestine generates luminal carbonate precipitates of divalent cations that play a key role in water and ion homeostasis. *In vitro* studies highlight the involvement of the calciotropic hormones PTHrP (parathyroid hormone-related protein) and stanniocalcin (STC) in the regulation of epithelial bicarbonate transport. The present study tested the hypothesis that calciotropic hormones have a regulatory role in carbonate precipitate formation *in vivo*. Sea bream (*Sparus aurata*) juveniles received single intraperitoneal injections of piscine PTHrP(1–34), the PTH/PTHrP receptor antagonist PTHrP(7–34) or purified sea bream STC, or were passively immunized with polyclonal rabbit antisera raised against sea bream STC (STC-Ab). Endocrine effects on the expression of the basolateral sodium bicarbonate co-transporter (Slc4a4.A), the apical anion exchangers Slc26a6.A and Slc26a3.B, and the V-type proton pump  $\beta$ -subunit (Atp6v1b) in the anterior intestine were evaluated. In keeping with their calciotropic nature, the hypocalcaemic factors PTHrP(7–34) and STC up-regulated gene expression of all transporters. In contrast, the hypercalcaemic factor PTHrP(1–34) and STC antibodies down-regulated transporters involved in the bicarbonate secretion cascade. Changes in intestine luminal precipitate contents provoked by calcaemic endocrine factors validated these results: 24 h post-injection either PTHrP(1–34) or immunization with STC-Ab reduced the carbonate precipitate content in the sea bream intestine. In contrast, the PTH/PTHrP receptor antagonist PTHrP(7–34) increased not only the precipitated fraction but also the concentration of  $\text{HCO}_3^-$  equivalents in the intestinal fluid. These results confirm the hypothesis that calciotropic hormones have a regulatory role in carbonate precipitate formation *in vivo* in the intestine of marine fish. Furthermore, they illustrate for the first time in fish the counteracting effect of PTHrP and STC, and reveal an unexpected contribution of calcaemic factors to acid–base balance.

**KEY WORDS:** Intestinal physiology, Calcium regulation, Bicarbonate secretion, Ion transporter, Endocrine regulation, Calciotropic hormones

**INTRODUCTION**

Marine teleosts sustain an ionic equilibrium with seawater to keep their plasma osmolality within narrow limits. To achieve this, the gills remove excess salts from the body (Evans et al., 2005) in a secretion process that indirectly causes water loss. Therefore, water replacement by drinking becomes essential to sustain ion regulation

(Fuentes and Eddy, 1997a). In addition to regulation of the amount of water ingested by endocrine and environmental factors (Fuentes et al., 1996; Fuentes and Eddy, 1997a; Fuentes and Eddy, 1997b; Guerreiro et al., 2004; Guerreiro et al., 2001), the processing of imbibed fluid has a major impact in fish ion regulation. Ingested water is first processed in the oesophagus, where it undergoes selective absorption of NaCl (Hirano and Mayer-Gostan, 1976; Parmelee and Renfro, 1983), which lowers fluid osmolality and is believed to enhance water absorption in the intestine.

Essential to intestinal fluid processing, and thus intestinal water absorption, is the production of luminal divalent carbonate precipitates in marine teleosts (Grosell, 2006; Grosell, 2011; Kurita et al., 2008; Walsh et al., 1991; Wilson et al., 2002). Luminal precipitate formation requires high concentrations of divalent ions and a chemically favourable high pH. The high divalent ion content required for precipitate formation is supplied by the high calcium content of imbibed seawater, which reaches the intestine in a concentration range that varies between 3 and  $15 \text{ mmol l}^{-1}$  depending on the species (Fuentes et al., 2006; Genz et al., 2011; Grosell et al., 2001; Wilson et al., 2002). The alkaline pH of the luminal fluid that provides a favourable chemical environment for carbonate precipitation results from high rates of epithelial  $\text{HCO}_3^-$  secretion by the enterocytes (Grosell, 2006; Grosell, 2011)

Mechanisms for epithelial  $\text{HCO}_3^-$  secretion are dependent on luminal  $\text{Cl}^-$  and involve apical  $\text{Cl}^-/\text{HCO}_3^-$  exchangers (Ando and Subramanyan, 1990; Grosell et al., 2005; Wilson et al., 1996), in particular, members of the SLC26 family, that secrete  $\text{HCO}_3^-$  and absorb  $\text{Cl}^-$  (Grosell and Genz, 2006; Grosell et al., 2009b; Kurita et al., 2008). In addition to apical mechanisms, a basolateral  $\text{Na}^+/\text{HCO}_3^-$  co-transporter (NBC), which belongs to the SLC4 gene family, leads to accumulation of cellular  $\text{HCO}_3^-$  to fuel apical secretion (Kurita et al., 2008; Taylor et al., 2010). Furthermore, a bafilomycin-sensitive  $\text{H}^+$  pump participates in the regulation of apical  $\text{HCO}_3^-$  secretion in seawater-adapted rainbow trout and gulf toadfish (Grosell et al., 2009a; Guffey et al., 2011) and is also important for regional specialization of fluid processing in the sea bream intestine (Gregório et al., 2013).

Calcium as well as  $\text{HCO}_3^-$  immobilization in the luminal carbonate precipitates results in reduced fluid osmolality and favours water absorption. Therefore,  $\text{HCO}_3^-$  secretion in marine fish intestine drives not only luminal precipitate formation but also water absorption (Grosell, 2011). In keeping with this suggestion, a recent study in the gulf toadfish demonstrated a role for the  $\text{HCO}_3^-$ -sensing soluble adenylyl cyclase (sAC) in intestinal water absorption (Tresguerres et al., 2010), a process also occurring in the sea bream intestine (Carvalho et al., 2012).

The importance of fish intestinal carbonate precipitate production in the ocean carbon cycle has recently been highlighted (Wilson et al., 2009) and brings a new dimension to the ecophysiology of fish and their environment. The endocrine factors that regulate drinking,

Centre of Marine Sciences (CCMar), Campus de Gambelas, Universidade do Algarve, 8005-139 Faro, Portugal.

\*Author for correspondence (jfuentes@ualg.pt)

fluid processing, epithelial  $\text{HCO}_3^-$  secretion and precipitate production require more detailed study. *In vitro* studies have revealed that the calciotropic hormones STC (stanniocalcin) and PTHrP (parathyroid hormone-related protein) (Fuentes et al., 2010) regulate not only calcium transport but also the epithelial rate of  $\text{HCO}_3^-$  secretion in sea bream. Prolactin (Ferlazzo et al., 2012) and both transmembrane and soluble adenylyl cyclases participate in the regulation of intestinal epithelial  $\text{HCO}_3^-$  secretion (Carvalho et al., 2012), and hypercalcaemic PTHrP regulates drinking rates *in vivo* in sea bream larvae (Guerreiro et al., 2001) and intestinal calcium transport *in vitro* (Fuentes et al., 2006). Taken together, the results from *in vitro* studies support a role for the calciotropic hormones STC and PTHrP in the processing of intestinal fluid in marine fish. Therefore, the objectives of the present study were to (i) establish the relative importance of the calciotropic hormones PTHrP and STC in the regulation of the main molecular mechanisms (SLC26a6, SLC26a3, SLC4a4 and Atp6v1b) involved in epithelial  $\text{HCO}_3^-$  secretion in the intestine of the sea bream *Sparus aurata* L., and (ii) establish their physiological relevance in intestinal precipitate formation *in vivo*.

## RESULTS

### STC antiserum validation

Western blot analysis of sea bream serum with an antibody generated against purified sea bream STC identified a single immunoreactive band (Fig. 1). The apparent size of the immunoreactive band under denaturing reducing conditions is 3 kDa smaller than the purified STC (26 kDa). This apparent disparity in size is probably related to the removal of the 30 amino acid signal peptide in the N-terminus of STC, as previously described for other fish species (Amemiya et al., 2006; Amemiya et al., 2002). Pre-absorption of the sea bream anti-STC sera with a protein extract of isolated Stannius corpuscles ablated the immunoreactive band obtained in western blots of serum and purified STC, and confirms antisera specificity.

### STC immunolocalization

STC immunoreaction (Fig. 2) was restricted to the Stannius corpuscles and no immunoreaction was detected in the adjacent kidney (Fig. 2A,D). Moreover, the immunoreaction was restricted to the cell cytoplasm (Fig. 2E). No immunoreaction was obtained when

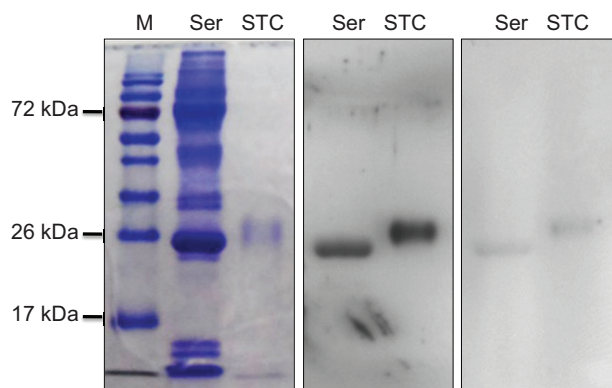

**Fig. 1. STC antiserum is specific for stanniocalcin.** Left: protein profile of a Coomassie Blue-stained acrylamide gel of sea bream serum (Ser) and purified sea bream stanniocalcin (STC). M, marker. Centre: western blot using antisera (1:50,000) raised against purified sea bream STC, revealing a single immunoreactive band in the serum. Right: decreased signal in the western blot using antisera pre-absorbed with an extract of sea bream Stannius corpuscles (see Materials and methods for further details).

antisera pre-absorbed with extracts of the Stannius corpuscles was used (Fig. 2C,F).

### Endocrine regulation of plasma calcium

Intraperitoneal injection of PTHrP(1–34) alone, STC antisera alone or a combination of the two treatments induced comparable significant increases in circulating plasma calcium in sea bream juveniles 24 h post-injection (Fig. 3A). Intraperitoneal injection of the PTHrP receptor antagonist PTHrP(7–34) alone or STC alone resulted in absolute plasma calcium levels lower than those of the controls, but the effect was not significant (Fig. 3B). However, intraperitoneal injection of PTHrP(7–34) and STC combined as a single treatment significantly reduced plasma calcium in sea bream juveniles (Fig. 3B).

### Endocrine regulation of intestinal transporter expression

Intraperitoneal injection of PTHrP(1–34) alone, STC antisera alone or a combination of the two treatments induced comparable significant decreases in the expression of all genes analysed, i.e. the basolateral sodium bicarbonate co-transporter gene *SLC4a4*, the V-type proton pump  $\beta$ -subunit gene *Atp6v1b* and the apical anion exchanger genes *SLC26a3* and *SLC26a6*, in the anterior intestine of sea bream juveniles 24 h post-injection (Fig. 4).

Intraperitoneal injection of the PTHrP receptor antagonist PTHrP(7–34) alone or in combination with STC resulted in a significant increase in the expression of *SLC4a4*, *Atp6v1b*, *SLC26a3* and *SLC26a6* in the anterior intestine of sea bream juveniles 24 h post-injection (Fig. 5). However, no significant effects were achieved in response to STC alone, although the general trend was an increase in the expression of all transporters (Fig. 5).

### Effect of PTHrP and STC on intestine luminal precipitate contents

$\text{HCO}_3^-$  concentration in the intestinal fluid of control fish averaged 45 mequiv  $\text{l}^{-1}$  (Fig. 6) and the total carbonate in the precipitate expressed as the average of  $\text{CaCO}_3 + \text{MgCO}_3$  was of the order of 350 mequiv  $\text{g}^{-1}$  of body mass ( $M_b$ ) in control fish. Intraperitoneal injection of PTHrP(1–34) alone resulted in a trend for lower levels of  $\text{HCO}_3^-$  in the intestinal fluid and a significant decrease of total carbonate content in the intestinal precipitate fraction (Fig. 6). In contrast, intraperitoneal injection of the PTHrP receptor antagonist PTHrP(7–34) resulted in a significant increase in  $\text{HCO}_3^-$  in the intestinal fluid and in total carbonate content of the intestinal precipitate (Fig. 6). Additionally, intraperitoneal injection of STC antibodies significantly decreased  $\text{HCO}_3^-$  in the intestinal fluid and total carbonate content of the intestinal precipitate. STC treatment alone was omitted as insufficient purified native sea bream STC was available to treat sea bream juveniles of 20–25 g  $M_b$ .

## DISCUSSION

The present study establishes *in vivo* effects of the calciotropic hormones PTHrP and STC on the mechanisms of carbonate precipitation in the sea bream intestine. This claim is based on the fact that: (1) the hypercalcaemic or hypocalcaemic factors regulate in a reproducible manner key molecular mechanisms involved in the epithelial  $\text{HCO}_3^-$  secretion cascade; (2) the regulatory effect is predictable; and (3) they modify luminal intestinal bicarbonate/carbonate content of both the intestinal fluid and the precipitate fraction.

In a previous study (Fuentes et al., 2010), the *in vitro* actions of PTHrP(1–34) and STC in the regulation of epithelial  $\text{HCO}_3^-$  secretion in the intestine of the sea bream were revealed. To extend the *in vitro*

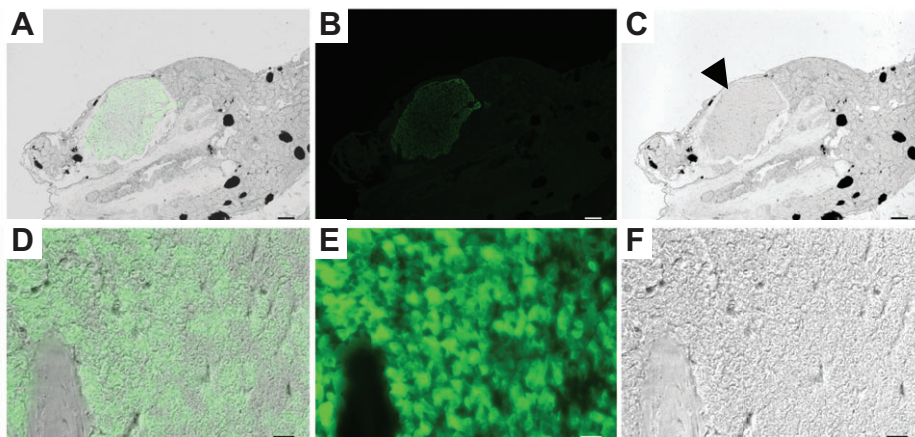

**Fig. 2. Immunolocalization of STC in serial sections of sea bream kidney and Stannius corpuscles.** (A,D) Merge, (B,E) Green/488 and (C,F) brightfield (see Materials and methods for further details). Note that the positive STC signal is limited to the Stannius corpuscles and appears with highest intensity in the centre of the glands. Scale bars: A–C, 100  $\mu\text{m}$ ; D–F, 10  $\mu\text{m}$ . Black arrowhead in C indicates the position of a Stannius corpuscle.

results to an *in vivo* situation, both PTHrP(1–34) and the receptor antagonist PTHrP(7–34), which has an established bioactivity in sea bream *in vivo* (Fuentes et al., 2007a), was utilized. The effect of the receptor antagonist PTHrP(7–34) on epithelial  $\text{HCO}_3^-$  secretion *in vivo* indicates that the effects of PTHrP(1–34) on epithelial  $\text{HCO}_3^-$  secretion in the intestine occur through one of the three previously characterized teleost PTH receptors. The STC receptor(s) sequence(s) remains unidentified, which consequently precludes the design of receptor-specific antagonists. However, a previous study in tilapia (Fenwick et al., 1995) revealed that passive immunization with

antibodies against fish STC is a useful tool to uncover the physiological actions of STC in fish calcium physiology. For this reason, specific polyclonal antibodies raised against the purified native sea bream STC (Fuentes et al., 2010) that recognize STC in western blotting (Fig. 1) and immunohistochemistry (Fig. 2) were used in the present study. A significant characteristic of this antibody is its ability to modify plasma calcium levels in the expected direction (increase) within 24 h of administration as a single intraperitoneal injection to sea bream juveniles (Fig. 3). This effect is similar to the action of PTHrP(1–34) when administered alone or in combination with STC antibodies. Together, these results support the idea that manipulation of plasma calcium can be achieved by administering PTHrP to potentiate hypercalcaemia, or by inhibition of the hypocalcaemia-blocking agent by administration of STC antibodies. The notion that PTHrP and STC have counter-effects on plasma calcium regulation was consolidated by the demonstration that the PTH/PTHrP receptor antagonist PTHrP(7–34) or purified sea bream STC administered alone failed to significantly decrease plasma calcium. In contrast, co-administration of PTHrP(7–34) and STC significantly decreased plasma calcium levels *in vivo*.

The PTHrP/STC endocrine regulatory system(s) provides alternative mechanisms for the control of plasma calcium levels, and probably regulates other putative downstream actions of PTHrP and STC in fish. In this context, PTHrP and STC have opposite effects on the regulation of  $\text{HCO}_3^-$  secretion in the intestine of marine fish *in vitro* (Fuentes et al., 2010). In this intestinal model, the process of apical  $\text{HCO}_3^-$  secretion relies on luminal  $\text{Cl}^-$ , suggesting the involvement of  $\text{Cl}^-/\text{HCO}_3^-$  exchangers (Grosell et al., 2009b; Grosell et al., 2005; Wilson et al., 1996). Amongst the members of the SLC26 family, SLC26a6 and SCL26a3 were targeted in the present study as they exhibit  $\text{Cl}^-/\text{HCO}_3^-$  exchange activity (Mount and Romero, 2004). For example, the mefugu SLC26a6 shows a high capacity for  $\text{HCO}_3^-$  transport when expressed in *Xenopus* oocytes (Kurita et al., 2008), and its expression is salinity dependent in both mefugu (Kurita et al., 2008) and the sea bream (Gregório et al., 2013). There is a limited body of literature describing the endocrine control of anion exchangers in vertebrates and the present study contributes to this by demonstrating that SLC26a6 and SCL26a3 expression is regulated by different combinations of hypercalcaemic or hypocalcaemic factors in the anterior intestine of the sea bream. Thus, hypercalcaemic factors [e.g. PTHrP(1–34) and passive immunization with STC antisera] down-regulate the expression of both transporters. Further studies will be required to establish why STC administration failed to modify SLC26a6 and SCL26a3 expression but it may be related to the dose of STC given

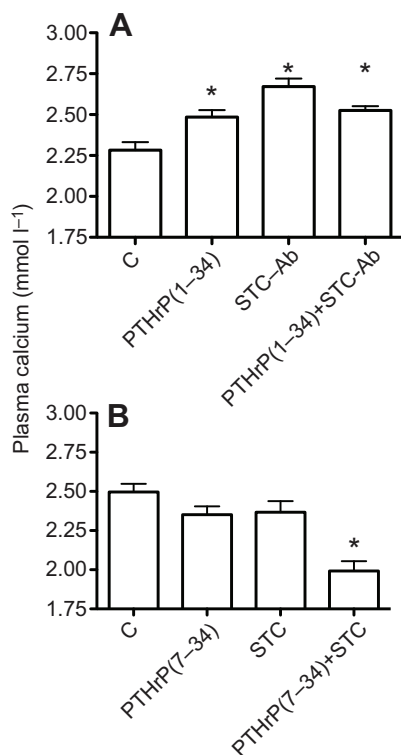

**Fig. 3. Plasma calcium levels in sea bream juveniles.** (A) Calcium levels in response to a single intraperitoneal injection of rabbit pre-immune serum (C, control), PTHrP(1–34), rabbit anti-sea bream STC antiserum (STC–Ab) or a combination of PTHrP(1–34)+STC–Ab. (B) Calcium levels in response to a single intraperitoneal injection of saline (C, control), PTHrP(7–34), purified sea bream STC or a combination of PTHrP(7–34)+STC. Each column represents the mean + s.e.m. ( $N=6-8$ ). Asterisks indicate significant differences ( $P<0.05$ ) from corresponding control groups.

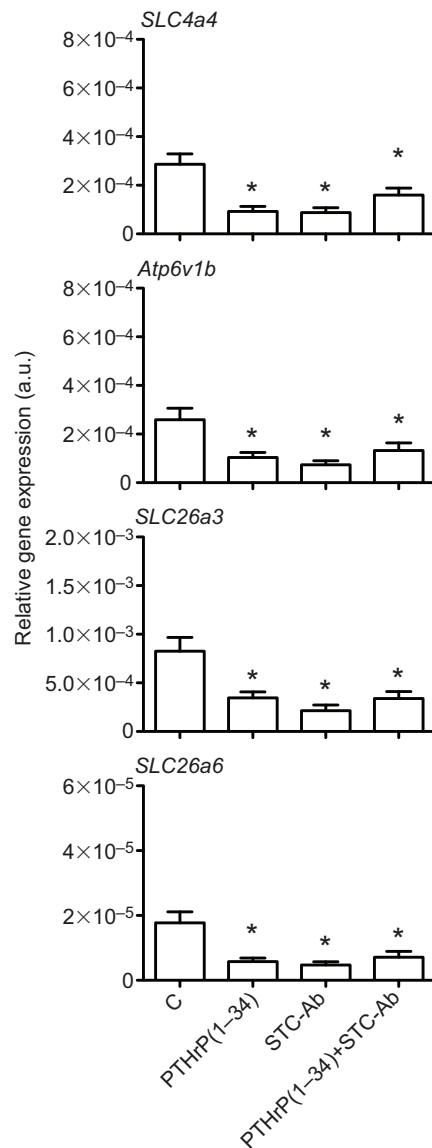

**Fig. 4. Intestinal transporter regulation by hypercalcemic factors.**

Relative expression (a.u., arbitrary units: gene of interest/*18S*) of *Slc4a4*,  $\beta$ -subunit of the V-type proton pump (*Atp6v1b*), *Slc26a3* and *Slc26a6* in the anterior intestine of sea bream juveniles in response to a single intraperitoneal injection of rabbit pre-immune serum (C, control), PTHrP(1–34), rabbit anti-sea bream STC antiserum (STC-Ab) or a combination of PTHrP(1–34)+STC-Ab. Each column represents the mean + s.e.m. ( $N=7-8$ ). Asterisks indicate significant differences ( $P<0.05$ ) from the corresponding control groups.

or the already high levels of STC detected in fish plasma (Mayer-Gostan et al., 1992).

A proton pump is present in the marine fish intestine (Gregório et al., 2013; Guffey et al., 2011) and is probably associated with intestinal fluid processing via modulation of epithelial  $\text{HCO}_3^-$  secretion. In the intestine of the gulf toadfish, the proton pump constitutes a functional metabolon with the SLC26a6 anion exchanger, and drives intestinal  $\text{Cl}^-$  uptake against a steep electrochemical gradient (Grosell et al., 2009b) and enables epithelial competence for  $\text{HCO}_3^-$  secretion. In light of this idea, it was unsurprising that the regulation of expression of *Atp6v1b* (proton pump  $\beta$ -subunit) in the anterior intestine of the sea bream paralleled the response to endocrine regulation described for SLC26a6 (Figs 4, 5).

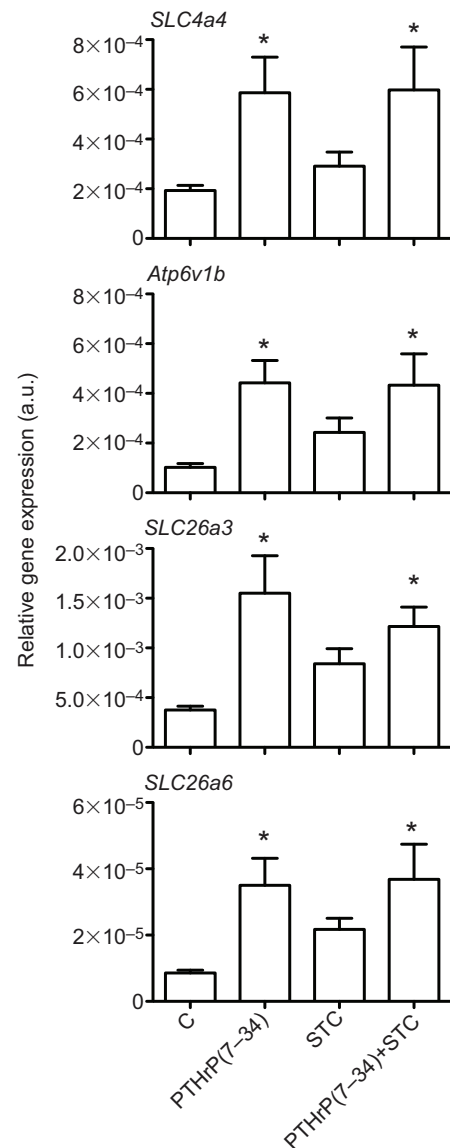

**Fig. 5. Intestinal transporter regulation by hypocalcemic factors.**

Relative expression (a.u., arbitrary units: gene of interest/*18S*) of *Slc4a4*, *Atp6v1b*, *Slc26a3* and *Slc26a6* in the anterior intestine of sea bream juveniles in response to a single intraperitoneal injection of saline (C, control), PTHrP(7–34), purified sea bream STC or a combination of PTHrP(7–34)+STC. Each column represents the mean + s.e.m. ( $N=6-8$ ). Asterisks indicate significant differences ( $P<0.05$ ) from the corresponding control groups.

In fish intestine, SLC4a4 is located in the basolateral membrane of the enterocyte and is highly expressed in seawater fish (Kurita et al., 2008). SLC4a4 is a high capacity  $\text{HCO}_3^-$  supply that drives transcellular secretion at the apical membrane of the enterocyte and is suggested to act as a limiting step of  $\text{HCO}_3^-$  secretion in the intestine of marine fish (Chang et al., 2012; Taylor et al., 2010). The capacity of calcitropic factors to modulate the expression of SLC4a4 in the anterior intestine of the sea bream (Figs 4, 5) provides evidence that reinforces the relationship between epithelial calcium movements and  $\text{HCO}_3^-$  secretion in the intestine of marine fish. However, the present study reveals that the antagonistic action of PTHrP and STC goes beyond calcium regulation and that they also affect key mechanisms of the

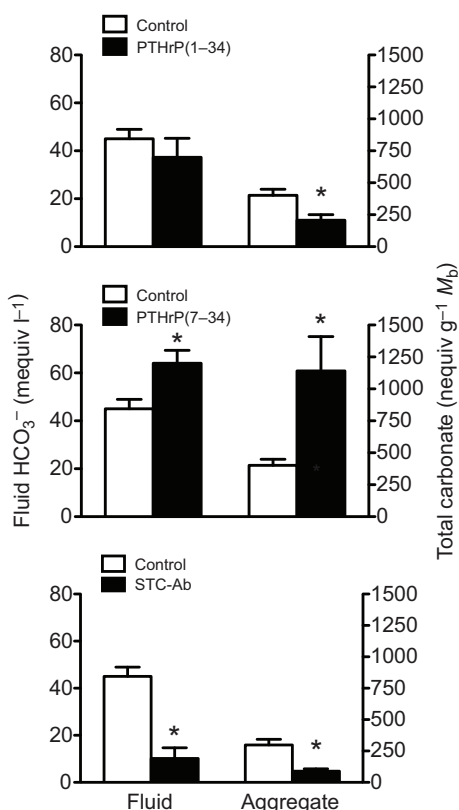

**Fig. 6. Endocrine regulation of intestinal carbonate aggregates.** Intestinal fluid total HCO<sub>3</sub><sup>-</sup> and intestinal precipitate total carbonate content (CaCO<sub>3</sub> + MgCO<sub>3</sub>) in response to a single intraperitoneal injection of saline (control), PTHrP(1–34) or rabbit anti-sea bream STC antiserum (STC-Ab). Each column represents the mean + s.e.m. (N=5–7). Asterisks indicate significant differences (P<0.05) from corresponding control groups.

intestinal HCO<sub>3</sub><sup>-</sup> secretion cascade. In particular, the calcitropic hormones had a similar effect on the transcript abundance of SLC26a3, SLC26a6, SLC4a4 and Atp6v1b transporters in the sea bream intestine and this contrasts with the *ex vivo* effect of prolactin (Ferlazzo et al., 2012), where only SLC4a4 transcript abundance was modified in the intestine. The divergence between PTHrP, STC and prolactin action may arise from the experimental approach (*in vivo* versus *ex vivo*) or may simply reflect the physiological roles and selectivity of these hormones.

The intestinal molecular response to hypercalcaemic/hypocalcaemic treatment established an important feature; the molecular mechanisms targeted by the two calcitropic hormones in the formation of carbonate precipitates are the same. In light of this result the relative importance, if any, of such regulation in normal physiology could only be accessed *in vivo*. The intestinal fluid and the precipitate fraction were treated as different compartments, as the fluid acts as an intermediate step between epithelial HCO<sub>3</sub><sup>-</sup> secretion and the final precipitation in the form of intestinal carbonate precipitates. The precipitated fraction represented the values as total carbonate to account for the magnesium and calcium content of the precipitates (Perry et al., 2011; Woosley et al., 2012). The results revealed parallel endocrine effects (Fig. 6) in the two fractions, clearly demonstrating the endocrine regulation of intestinal carbonate precipitation. Hypercalcaemic factors reduced the amount of carbonate precipitate, e.g. PTHrP(1–34) treatment reduced precipitated carbonates to about 50%, while immunization with STC antibodies reduced precipitates by about 65%. In contrast,

hypocalcaemic factors increased precipitate output: the PTH/PTHrP receptor antagonist PTHrP(7–34) induced about a 3-fold increase in the precipitate fraction present in the intestinal lumen.

Fish intestinal carbonate precipitate production has a significant (Wilson et al., 2009) impact in the ocean carbon cycle. Consequently, the characterization of the endogenous endocrine response to the predicted ocean acidification will be essential to model and establish the contribution of fish in a changing environment. The present study demonstrates the predictable effect of the calcitropic hormones STC and PTHrP on the regulation of intestinal mechanisms related to epithelial HCO<sub>3</sub><sup>-</sup> secretion, and exposes the end result on precipitate formation. Assuming that intestinal water absorption and epithelial HCO<sub>3</sub><sup>-</sup> are functionally associated (Carvalho et al., 2012; Grosell, 2011; Tresguerres et al., 2010), the endocrine regulation of epithelial HCO<sub>3</sub><sup>-</sup> secretion may have a central role in this process. The endogenous modulation of carbonate precipitation in the intestine highlights a novel physiological role for calcium-regulating factors and probably impacts the general osmoregulatory process in marine fish, and may have a global impact in the ocean carbon cycle.

## MATERIALS AND METHODS

### Peptides and chemicals

*In vivo* and *in vitro* PTHrP(1–34) and PTHrP(7–34) bioactivity has previously been reported in fish (Canario et al., 2006; Fuentes et al., 2006; Fuentes et al., 2007a; Fuentes et al., 2007b; Guerreiro et al., 2001; Rotllant et al., 2005). STC was purified from the sea bream Stannius corpuscles and bioactivity has been confirmed using *in vitro* Ussing-type chambers (Fuentes et al., 2010). All chemicals were of the highest grade and obtained from Sigma-Aldrich unless stated otherwise.

### Animals

Sea bream (*Sparus aurata*) juveniles were obtained from commercial sources (CUPIMAR SA, Cádiz, Spain) and maintained in open-seawater circuits under natural conditions of water temperature (18–20°C), photoperiod and salinity (37 ppt) at a density <5 kg m<sup>-3</sup>. For maintenance, fish were fed twice daily to a final ration of 2% of M<sub>b</sub>, with a commercial sea bream diet (Trow España SA, Cojóbar, Burgos, Spain). All fish were fasted for 24 h before experimental manipulations.

All animal manipulations were carried out in compliance with the Guidelines of the European Union Council (86/609/EU) and Portuguese legislation for the use of laboratory animals. All animal protocols were performed under a Group-1 licence from the Direcção-Geral de Veterinária, Ministerio da Agricultura, do Desenvolvimento Rural e das Pescas, Portugal.

### STC antibody validation

Antibodies were commercially produced in rabbits (Genemed Synthesis, Sigma-Aldrich, Madrid, Spain) with a triple boost of 1 mg purified native sea bream STC (Fuentes et al., 2010). All antibody procedures were performed with the neat antiserum and no purification attempt was made. For tissue and serum collection, sea bream (N=4, 250 g M<sub>b</sub>) were anaesthetized (2-phenoxyethanol 1:10,000; Sigma-Aldrich); blood was obtained by puncture of the caudal peduncle, left to clot on ice and serum was then obtained by centrifugation (10,000 rpm for 5 min); this was stored at –20°C for later use. Stannius corpuscles were dissected out after decapitation of the sea bream, and either fixed in Bouin's fixative or flash-frozen in liquid N<sub>2</sub> and stored at –20°C for later use.

### SDS-PAGE and western blot

Stannius corpuscles were homogenized in extraction buffer (240 mmol l<sup>-1</sup> Tris; 48% glycerol; 13.5% SDS) and total protein in the extract quantified (Nanodrop 1000, Thermo Scientific, Waltham, MA, USA). Serum samples (2 µl per lane) and purified sea bream STC (800 ng per lane) were separated by SDS-PAGE on 15% polyacrylamide gels under reducing conditions at 100 V and blotted onto enhanced chemiluminescence (ECL) membranes (Hybond-P PVDF ECL, Amersham Biosciences) in a vertical tank transfer

system (Mighty Small Hoefer, Amersham Pharmacia) for 1 h at 250 A. The membranes were incubated with blocking solution [3% (w/v) BSA, 0.1% (v/v) Tween 20 in Tris-buffered saline (TBS)] overnight at 4°C. Subsequently, membranes were washed in TBS-T and incubated for 2 h at room temperature with constant agitation with either the diluted STC primary antisera (1:50,000 in TBS-T) or antisera pre-absorbed with an extract of *Stannius corpuscles*. Antibody pre-absorption was performed overnight at 4°C with an antibody dilution of 1:1000 in TBS-T in the presence of an extract of sea bream *Stannius corpuscles* (see above) with 1 µg ml<sup>-1</sup> total crude protein. After incubation with primary antibody, the excess antibody was removed, and the membranes were washed several times in TBS-T and incubated with a secondary antibody (anti-rabbit IgG-peroxidase conjugate 1:35,000, Sigma-Aldrich) for 1 h at room temperature. Excess secondary antibody was removed and the membranes were washed several times in TBS-T and incubated with streptavidin-horseradish peroxidase conjugate (GE Healthcare, Amersham) diluted 1:50,000 in TBS-T at room temperature for 1 h. Excess streptavidin was removed, and membranes were washed several times in TBS-T and developed using the ECL Prime western blotting reagents kit (GE Healthcare, Amersham) following the manufacturer's protocol.

### Immunohistochemistry

After fixation with Bouin's fixative, kidney tissue containing the *Stannius corpuscles* was rinsed in PBS, dehydrated and embedded in wax, and serial sagittal sections (5 µm thickness) were prepared and mounted onto poly-L-lysine-coated slides for subsequent immunohistochemical analysis. Prior to antibody incubation, sections were washed with a solution of PBS (1×), (0.1%) Triton X-100 and 10% sheep serum (Sigma-Aldrich) for 1 h at room temperature. Slides were incubated overnight at 4°C with rabbit polyclonal STC antibody (1:2500 dilution). After washing with PBS (1×, 0.1% Triton X-100) the sections were incubated overnight at 4°C with a secondary antibody (goat anti-rabbit IgG H-R Hygligh-488, 1:400 dilution; AnaSpec, Fremont, CA, USA) and then washed in PBS (1×, 0.1% Triton X-100), and mounted with VectaShield (Vector Labs, Burlingame, CA, USA). Fluorescence microscopy images were captured using a Zeiss Z2 Axioscope fluorescence microscope coupled to a Zeiss HR camera. Preliminary testing was conducted to optimize anti-STC dilution. None of the negative controls (normal host sera, omission of primary antibody) gave a signal.

### Plasma calcium and intestinal transporter expression

Unfed sea bream ( $N=80$ , body mass 2.5–3.5 g) were anaesthetized in 2-phenoxyethanol (1:10,000; Sigma-Aldrich) and weighed to the nearest 0.1 g.

In the first experiment, fish received a single intraperitoneal injection of pre-immune rabbit antiserum (5 µl g<sup>-1</sup>), PTHrP(1–34) (0.5 µg g<sup>-1</sup>), rabbit STC-Ab (5 µl g<sup>-1</sup>) and a combination of PTHrP(1–34) (0.5 µg g<sup>-1</sup>) + STC-Ab (5 µl g<sup>-1</sup>). In the second experiment, fish were injected with 0.9% NaCl (5 µl g<sup>-1</sup>), PTHrP(7–34) (0.5 µg g<sup>-1</sup>), purified sea bream STC (5 µg g<sup>-1</sup>), or a combination of PTHrP(7–34) (0.5 µg g<sup>-1</sup>) + purified sea bream STC (sbSTC, 5 µg g<sup>-1</sup>). Final injection volumes were of 5 µl g<sup>-1</sup> in all treatments. Dosages for PTHrP(1–34) and PTHrP(7–34) (receptor antagonist) used in the present study were based on those previously used in sea bream juveniles (Fuentes et al., 2007a).

After injection, fish were transferred to 60 l tanks with flowing seawater for recovery. Twenty-four hours after injection, fish were terminally anaesthetized with 2-phenoxyethanol (1:1000) and blood samples were collected into heparinized glass capillaries from the caudal peduncle after severing the tail. Plasma was obtained by centrifugation of whole blood (10,000 rpm for 5 min), and stored at –20°C for later analysis.

After decapitation of fish, samples from the anterior intestine, which corresponds to a section 1–1.5 cm in length caudal to the point of insertion of the pyloric caeca, were collected from individual fish and incubated overnight in RNALater (Ambion, Austin, TX, USA) at 4°C and stored at –20°C until utilized for RNA extraction (within 2 weeks).

Plasma calcium levels were determined in duplicate using a commercial kit (Spinreact, Girona, Spain) with a Benchmark Microplate Reader (Bio-Rad, Hercules, CA, USA).

Total RNA was extracted from samples of the anterior intestine with Total RNA Kit I (E.Z.N.A., Omega Bio-tek, Norcross, GA, USA) and the quantity and quality of RNA assessed (Nanodrop 1000, Thermo Scientific, Waltham, MA, USA). Prior to cDNA synthesis, RNA was treated with DNase using a DNA-free kit (Ambion) following the manufacturer's instructions. Reverse transcription of RNA into cDNA was carried out using the RevertAid First Strand cDNA Synthesis Kit (Fermentas, Thermo Scientific) with 500 ng of total RNA in a reaction volume of 20 µl.

Primers and reaction conditions followed those previously described (Ferlazzo et al., 2012; Gregório et al., 2013). Table 1 shows primer sequences and predicted amplicon sizes. Real-time qPCR amplifications were performed in duplicate in a final volume of 10 µl with 5 µl SsoFast EvaGreen Supermix (Bio-Rad) as the reporter dye, 20 ng cDNA, and 0.5 pmol µl<sup>-1</sup> of each forward and reverse primer. Amplifications were performed in 96-well plates using the One-step Plus sequence detection system (Applied Biosystems, Foster City, CA, USA) with the following protocol: denaturation and enzyme activation step at 95°C for 2 min, followed by 40 cycles of 95°C for 5 s and 60°C for 10 s. After the amplification phase, a temperature-determining dissociation step was carried out at 65°C for 15 s, and 95°C for 15 s. For normalization of cDNA loading, all samples were run in parallel using 18S rRNA (*18S*). To estimate efficiencies, a standard curve was generated for each primer pair from 10-fold serial dilutions (from 10 to 0.001 ng) from a cDNA pool that included all samples. Standard curves represented the cycle threshold value as a function of the logarithm of the number of copies generated, defined arbitrarily as one copy for the most diluted standard. All calibration curves exhibited correlation coefficients  $R^2 > 0.98$ , and the corresponding real-time PCR efficiencies were >99%.

### Endocrine effects on intestinal contents

This experiment was designed to test the effect of PTHrP(1–34), PTHrP(7–34) and the polyclonal sea bream antibody STC-Ab in the luminal fluid contents of the sea bream. STC was not tested as insufficient quantities were available.

Sea bream juveniles ( $N=36$ , 20–25 g  $M_b$ ) were anaesthetized in 2-phenoxyethanol (1:10,000) weighed to the nearest 0.1 g and received a single intraperitoneal injection of 0.9% NaCl (5 µl g<sup>-1</sup>, control), PTHrP(1–34) (0.5 µg g<sup>-1</sup>), PTHrP(7–34) (0.5 µg g<sup>-1</sup>) or STC-Ab (5 µg g<sup>-1</sup>). Individual control groups (0.9% NaCl injected) were run in parallel with

**Table 1. Primers for qPCR**

| Gene             | Primer | Sequence (5' to 3')   | $T_m$ (°C) | Size (bp) |
|------------------|--------|-----------------------|------------|-----------|
| <i>Slc26a3.B</i> | F      | ATCTCGGCTCTGAAGGGACT  | 60         | 162       |
|                  | R      | GAGCATTCTGTCCCTGCTC   |            |           |
| <i>Slc26a6.A</i> | F      | GCGGGACTGTTTCAGCGGAGG | 60         | 176       |
|                  | R      | TGCGAACACGCCTGAACGGCA |            |           |
| <i>Slc4a4.A</i>  | F      | ACCTTCATGCCACCGCAGGG  | 60         | 128       |
|                  | R      | CGCCGCCCGCGATAACTCTT  |            |           |
| <i>Atp6v1b</i>   | F      | TGTCTGCCTTTTTCCTGAACC | 60         | 180       |
|                  | R      | TGGGGATCTGGGTGATAGAG  |            |           |
| <i>18S</i>       | F      | AACCAGACAAATCGCTCCAC  | 60         | 139       |
|                  | R      | CCTGCGGCTTAATTTGACTC  |            |           |

F, forward; R, reverse.

each hormone treatment. After injection, fish were transferred for recovery to 150 l tanks supplied with well-aerated running seawater. Twenty-four hours after treatment, fish were anaesthetized with 2-phenoxyethanol (1:1000) and decapitated. The intestinal fluid of individual fish was collected from the excised intestinal tract clamped (from pyloric caeca to anal sphincter) with two mosquito forceps, and emptied into pre-weighed vials and centrifuged (12,000 g, 5 min) to separate fluid from precipitate.

The intestinal fluid was transferred to pre-weighed vials and the volume measured to the nearest 0.1 µl (0.1 mg assuming a density of 1). Intestinal fluid titratable alkalinity ( $\text{HCO}_3^- + \text{CO}_3^{2-}$ ) was manually measured using the double titration method and a combination semi-micro pH electrode (HI1330B, Hanna Instruments) attached to a pH-meter (PHM84, Radiometer, Copenhagen, Denmark) as follows: 50 µl of the intestinal fluid samples were diluted in 10 ml NaCl (40 mmol l<sup>-1</sup>), gassed with CO<sub>2</sub>-free gas for 30 min to remove CO<sub>2</sub> and titrated to pH 3.8 with 10 mmol l<sup>-1</sup> HCl; an additional gassing period of 20 min was applied to remove any remaining CO<sub>2</sub> and the sample was back titrated to its original pH with 10 mmol l<sup>-1</sup> NaOH. The volume difference between added acid and base in the two titrations and titrant molarities were used to calculate total HCO<sub>3</sub><sup>-</sup> equivalents (mequiv l<sup>-1</sup>). Intestinal precipitates were re-suspended in 400 µl of triple-distilled water, homogenized in a glass homogenizer and a 100 µl aliquot was double titrated as described for the intestinal fluid, normalized by fish mass and expressed as nequiv g<sup>-1</sup>.

### Statistics

All results are shown as means ± s.e.m. After assessment, homogeneity of variance and normality statistical analysis of the data were carried out using, as appropriate, Student's *t*-test or one-way analysis of variance followed by the *post hoc* Bonferroni test to establish differences from control groups. All statistical analyses were performed using GraphPad Prism version 5.00 for Macintosh (GraphPad Software, San Diego, CA, USA). Groups were considered significantly different for *P*<0.05.

### Acknowledgements

The authors acknowledge Ramalhete Marine Station (CCMar, University of Algarve, Portugal) for fish maintenance and Professor J. M. Mancera (University of Cadiz, Spain) for access to sea bream fry.

### Competing interests

The authors declare no competing financial interests.

### Author contributions

J.F. conceived the study. S.F.G., E.S.M.C., M.A.C. and J.F. performed the experiments. S.F.G. and J.F. drafted the manuscript. S.F.G., E.S.M.C., M.A.C., D.M.P., A.V.M.C. and J.F. wrote paper.

### Funding

This work was supported by the Portuguese Foundation for Science and Technology (Ministry of Science and Higher Education, Portugal and European Social Funds) through grants [PTDC/MAR/104008/2008] and [PTDC/MAR-BIO/3811/2012] to J.F. and post-doctoral support [SFRH/BPD/66808/2009] to M.A.C.

### References

Amemiya, Y., Marra, L. E., Reyhani, N. and Youson, J. H. (2002). Stanniocalcin from an ancient teleost: a monomeric form of the hormone and a possible extracorporeal distribution. *Mol. Cell. Endocrinol.* **188**, 141-150.

Amemiya, Y., Irwin, D. M. and Youson, J. H. (2006). Cloning of stanniocalcin (STC) cDNAs of divergent teleost species: monomeric STC supports monophyly of the ancient teleosts, the osteoglossomorphs. *Gen. Comp. Endocrinol.* **149**, 100-107.

Ando, M. and Subramanyan, V. V. (1990). Bicarbonate transport systems in the intestine of the seawater eel. *J. Exp. Biol.* **150**, 381-394.

Canario, A. V. M., Rotllant, J., Fuentes, J., Guerreiro, P. M., Rita Teodósio, H., Power, D. M. and Clark, M. S. (2006). Novel bioactive parathyroid hormone and related peptides in teleost fish. *FEBS Lett.* **580**, 291-299.

Carvalho, E. S., Gregório, S. F., Power, D. M., Canário, A. V. and Fuentes, J. (2012). Water absorption and bicarbonate secretion in the intestine of the sea bream are regulated by transmembrane and soluble adenylyl cyclase stimulation. *J. Comp. Physiol. B* **182**, 1069-1080.

Chang, M. H., Plata, C., Kurita, Y., Kato, A., Hirose, S. and Romero, M. F. (2012). Euryhaline pufferfish NBCE1 differs from nonmarine species NBCE1 physiology. *Am. J. Physiol.* **302**, C1083-C1095.

Evans, D. H., Piermarini, P. M. and Choe, K. P. (2005). The multifunctional fish gill: dominant site of gas exchange, osmoregulation, acid-base regulation, and excretion of nitrogenous waste. *Physiol. Rev.* **85**, 97-177.

Fenwick, J. C., Flik, G. and Verbost, P. M. (1995). A passive immunization technique against the teleost hypocalcemic hormone stanniocalcin provides evidence for the cholinergic control of stanniocalcin release and the conserved nature of the molecule. *Gen. Comp. Endocrinol.* **98**, 202-210.

Ferlazzo, A., Carvalho, E. S., Gregorio, S. F., Power, D. M., Canario, A. V., Trischitta, F. and Fuentes, J. (2012). Prolactin regulates luminal bicarbonate secretion in the intestine of the sea bream (*Sparus aurata* L.). *J. Exp. Biol.* **215**, 3836-3844.

Fuentes, J. and Eddy, F. B. (1997a). Drinking in marine, euryhaline and freshwater teleost fish. In *Ionic Regulation in Animals* (ed. N. Hazon F. B. Eddy and G. Flik), pp. 135-149. Heidelberg: Springer-Verlag.

Fuentes, J. and Eddy, F. B. (1997b). Effect of manipulation of the renin-angiotensin system in control of drinking in juvenile Atlantic salmon (*Salmo salar* L.) in fresh water and after transfer to sea water. *J. Comp. Physiol. B* **167**, 438-443.

Fuentes, J., Bury, N. R., Carroll, S. and Eddy, F. B. (1996). Drinking in Atlantic salmon psmolts (*Salmo solar* L.) and juvenile rainbow trout (*Oncorhynchus mykiss* Walbaum) in response to cortisol and sea water challenge. *Aquaculture* **141**, 129-137.

Fuentes, J., Figueiredo, J., Power, D. M. and Canário, A. V. M. (2006). Parathyroid hormone-related protein regulates intestinal calcium transport in sea bream (*Sparus auratus*). *Am. J. Physiol.* **291**, R1499-R1506.

Fuentes, J., Guerreiro, P. M., Modesto, T., Rotllant, J., Canario, A. V. M. and Power, D. M. (2007a). A PTH/PTHrP receptor antagonist blocks the hypercalcemic response to estradiol-17β. *Am. J. Physiol.* **293**, R956-R960.

Fuentes, J., Haond, C., Guerreiro, P. M., Silva, N., Power, D. M. and Canário, A. V. M. (2007b). Regulation of calcium balance in the sturgeon *Acipenser naccarii*: a role for PTHrP. *Am. J. Physiol.* **293**, R884-R893.

Fuentes, J., Power, D. M. and Canário, A. V. M. (2010). Parathyroid hormone-related protein-stanniocalcin antagonism in regulation of bicarbonate secretion and calcium precipitation in a marine fish intestine. *Am. J. Physiol.* **299**, R150-R158.

Genz, J., McDonald, M. D. and Grosell, M. (2011). Concentration of MgSO<sub>4</sub> in the intestinal lumen of *Opsanus beta* limits osmoregulation in response to acute hypersalinity stress. *Am. J. Physiol.* **300**, R895-R909.

Gregório, S. F., Carvalho, E. S., Encarnação, S., Wilson, J. M., Power, D. M., Canário, A. V. and Fuentes, J. (2013). Adaptation to different salinities exposes functional specialization in the intestine of the sea bream (*Sparus aurata* L.). *J. Exp. Biol.* **216**, 470-479.

Grosell, M. (2006). Intestinal anion exchange in marine fish osmoregulation. *J. Exp. Biol.* **209**, 2813-2827.

Grosell, M. (2011). Intestinal anion exchange in marine teleosts is involved in osmoregulation and contributes to the oceanic inorganic carbon cycle. *Acta Physiol. (Oxf.)* **202**, 421-434.

Grosell, M. and Genz, J. (2006). Ouabain-sensitive bicarbonate secretion and acid absorption by the marine teleost fish intestine play a role in osmoregulation. *Am. J. Physiol.* **291**, R1145-R1156.

Grosell, M., Laliberte, C. N., Wood, S., Jensen, F. B. and Wood, C. M. (2001). Intestinal HCO<sub>3</sub><sup>-</sup> secretion in marine teleost fish: evidence for an apical rather than a basolateral Cl<sup>-</sup>/HCO<sub>3</sub><sup>-</sup> exchanger. *Fish Physiol. Biochem.* **24**, 81-95.

Grosell, M., Wood, C. M., Wilson, R. W., Bury, N. R., Hogstrand, C., Rankin, C. and Jensen, F. B. (2005). Bicarbonate secretion plays a role in chloride and water absorption of the European flounder intestine. *Am. J. Physiol.* **288**, R936-R946.

Grosell, M., Genz, J., Taylor, J. R., Perry, S. F. and Gilmour, K. M. (2009a). The involvement of H<sup>+</sup>-ATPase and carbonic anhydrase in intestinal HCO<sub>3</sub><sup>-</sup> secretion in seawater-acclimated rainbow trout. *J. Exp. Biol.* **212**, 1940-1948.

Grosell, M., Mager, E. M., Williams, C. and Taylor, J. R. (2009b). High rates of HCO<sub>3</sub><sup>-</sup> secretion and Cl<sup>-</sup> absorption against adverse gradients in the marine teleost intestine: the involvement of the electrogenic anion exchanger and H<sup>+</sup>-pump metabolon? *J. Exp. Biol.* **212**, 1684-1696.

Guerreiro, P. M., Fuentes, J., Power, D. M., Ingleton, P. M., Flik, G. and Canario, A. V. (2001). Parathyroid hormone-related protein: a calcium regulatory factor in sea bream (*Sparus aurata* L.) larvae. *Am. J. Physiol.* **281**, R855-R860.

Guerreiro, P. M., Fuentes, J., Flik, G., Rotllant, J., Power, D. M. and Canario, A. V. M. (2004). Water calcium concentration modifies whole-body calcium uptake in sea bream larvae during short-term adaptation to altered salinities. *J. Exp. Biol.* **207**, 645-653.

Guffey, S., Esbaugh, A. and Grosell, M. (2011). Regulation of apical H<sup>+</sup>-ATPase activity and intestinal HCO<sub>3</sub><sup>-</sup> secretion in marine fish osmoregulation. *Am. J. Physiol.* **301**, R1682-R1691.

Hirano, T. and Mayer-Gostan, N. (1976). Eel esophagus as an osmoregulatory organ. *Proc. Natl. Acad. Sci. USA* **73**, 1348-1350.

Kurita, Y., Nakada, T., Kato, A., Doi, H., Mistry, A. C., Chang, M. H., Romero, M. F. and Hirose, S. (2008). Identification of intestinal bicarbonate transporters involved in formation of carbonate precipitates to stimulate water absorption in marine teleost fish. *Am. J. Physiol.* **294**, R1402-R1412.

Mayer-Gostan, N., Flik, G. and Pang, P. T. (1992). An enzyme-linked immunosorbent assay for stanniocalcin, a major hypocalcemic hormone in teleost. *Gen. Comp. Endocrinol.* **86**, 10-19.

Mount, D. B. and Romero, M. F. (2004). The SLC26 gene family of multifunctional anion exchangers. *Pflügers Archiv* **447**, 710-721.

Parmelee, J. T. and Renfro, J. L. (1983). Esophageal desalination of seawater in flounder: role of active sodium transport. *Am. J. Physiol.* **245**, R888-R893.

- Perry, C. T., Salter, M. A., Harborne, A. R., Crowley, S. F., Jelks, H. L. and Wilson, R. W. (2011). Fish as major carbonate mud producers and missing components of the tropical carbonate factory. *Proc. Natl. Acad. Sci. USA* **108**, 3865-3869.
- Rotllant, J., Guerreiro, P. M., Anjos, L., Redruello, B., Canario, A. V. M. and Power, D. M. (2005). Stimulation of cortisol release by the N terminus of teleost parathyroid hormone-related protein in interrenal cells in vitro. *Endocrinology* **146**, 71-76.
- Taylor, J. R., Mager, E. M. and Grosell, M. (2010). Basolateral NBCe1 plays a rate-limiting role in transepithelial intestinal  $\text{HCO}_3^-$  secretion, contributing to marine fish osmoregulation. *J. Exp. Biol.* **213**, 459-468.
- Tresguerres, M., Levin, L. R., Buck, J. and Grosell, M. (2010). Modulation of NaCl absorption by  $[\text{HCO}_3^-]$  in the marine teleost intestine is mediated by soluble adenylyl cyclase. *Am. J. Physiol.* **299**, R62-R71.
- Walsh, P. J., Blackwelder, P., Gill, K. A., Danulat, E. and Mommsen, T. P. (1991). Carbonate deposits in marine fish intestines – a new source of biomineralization. *Limnol. Oceanogr.* **36**, 1227-1232.
- Wilson, R., Gilmour, K., Henry, R. and Wood, C. (1996). Intestinal base excretion in the seawater-adapted rainbow trout: a role in acid-base balance? *J. Exp. Biol.* **199**, 2331-2343.
- Wilson, R. W., Wilson, J. M. and Grosell, M. (2002). Intestinal bicarbonate secretion by marine teleost fish – why and how? *Biochim. Biophys. Acta* **1566**, 182-193.
- Wilson, R. W., Millero, F. J., Taylor, J. R., Walsh, P. J., Christensen, V., Jennings, S. and Grosell, M. (2009). Contribution of fish to the marine inorganic carbon cycle. *Science* **323**, 359-362.
- Woosley, R. J., Millero, F. J. and Grosell, M. (2012). The solubility of fish-produced high magnesium calcite in seawater. *J. Geophys. Res.* doi:10.1029/2011JC007599
